# Supplementary material
Source: PubMed Central journal article supplement (PMC5605431)
Supplement: NIHMS894687-supplement-2.pdf [file NIHMS894687-supplement-2.pdf]

**Supplementary Table 1 – Real-time PCR primer sequences**

| Gene         | Forward                          | Reverse                         |
|--------------|----------------------------------|---------------------------------|
| <i>p40</i>   | 5'- GGAAGCACGGCAGCAGAATA-3'      | 5'- AACTTGAGGGAGAAGTAGGAATGG-3' |
| <i>p35</i>   | 5'-AAGCCATCAACGCAGCACTT-3'       | 5'-GGAGGTTTCTGGCGCAGAGT-3'      |
| <i>p19</i>   | 5'-TGCTGGATTGCAGAGCAGTAA-3'      | 5'-GCATGCAGAGATTCCGAGAGA-3'     |
| <i>Il1b</i>  | 5'- CAACCAACAAGTGATATTCTCCATG-3' | 5'- GATCCACACTCTCCAGCTGCA-3'    |
| <i>Il6</i>   | 5'- CTCTGGGAAATCGTGGAAAT-3'      | 5'- CCAGTTTGGTAGCATCCATC-3'     |
| <i>Tnf</i>   | 5'-CCCTCACACTCAGATCATCTTCT-3'    | 5'-GCTACGACGTGGGCTACAG-3'       |
| <i>Lta</i>   | 5'- CCCTCAGAAGCACTTGACC-3'       | 5'- CAGAGAAAACCACCTGGGAG-3'     |
| <i>Il17a</i> | 5'-TGAAGGCAGCAGCGATCA-3'         | 5'-GGAAGTCCTTGGCCTCAGTGT-3'     |
| <i>Ifng</i>  | 5'- TCAAGTGGCATAGATGTGGAAGAA-3'  | 5'- GGCTCTGCAGGATTTTCATG-3'     |
| <i>Mmp2</i>  | 5'- ACCAAGAACTTCCGATTATCCC-3'    | 5'- CAGTACCAGTGTCAGTATCAGC-3'   |
| <i>Mmp3</i>  | 5'- GATGAACGATGGACAGAGGATG-3'    | 5'- AAACGGGACAAGTCTGTGG-3'      |
| <i>Mmp7</i>  | 5'- CTCTCAGAATGTGGAGTATGCAG-3'   | 5'- CATGACCTAGAGTGTTCCCTG-3'    |
| <i>Mmp8</i>  | 5'- CCAGCACCTATTCACCTACCTC-3'    | 5'- AGCATCAAATCTCAGGTGGG-3'     |
| <i>Mmp9</i>  | 5'- GATCCCCAGAGCGTCATTC-3'       | 5'- CCACCTTGTTACCTCATTG-3'      |
| <i>Mmp12</i> | 5'- CTTAACCCCAGCACATTTTCG-3'     | 5'- GTGACAGCATCAAACTCAAGC-3'    |
| <i>Mmp13</i> | 5'- TTGATGCCATTACCAGTCTCC-3'     | 5'- ACATGGTTGGGAAGTTCTGG-3'     |
| <i>Mmp14</i> | 5'- GGATGGACACAGAGAACTTCG-3'     | 5'- TTTTGGGCTTATCTGGGACAG-3'    |
| <i>Mmp19</i> | 5'- GAGCCCAGAGACAAGAGATG-3'      | 5'- AAGCATAAGTCTTCCCACGAG-3'    |
| <i>Ccl1</i>  | 5'- GGCTGCCGTGTGGATACAG-3'       | 5'- AGGTGATTTTGAACCCACGTTT-3'   |
| <i>Ccl3</i>  | 5'- TCATCGTTGACTATTTTGAACCCAG-3' | 5'- GCCGGTTTCTCTTAGTCAGGAA-3'   |
| <i>Ccl4</i>  | 5'- TGTCTGCCCTCTCTCCTCT-3'       | 5'- AGCAAGGACGCTTCTCAGTGA-3'    |

| Gene          | Forward                       | Reverse                       |
|---------------|-------------------------------|-------------------------------|
| <i>Ccl5</i>   | 5'- AGATCTCTGCAGCTGCCCTCA-3'  | 5'- GGAGCACTTGCTGCTGGTGTAG-3' |
| <i>Ccl20</i>  | 5'-CGACTGTTGCCTCTCGTACA-3'    | 5'- GAGGAGGTTACAGCCCTTT-3'    |
| <i>Cxcl9</i>  | 5'- CTGAGGCTCACGTCACCAAGTC-3' | 5'- GGCTCTAGGCTGACCCAAATG-3'  |
| <i>Cxcl10</i> | 5'- TCAAGCCATGGTCCTGAGACAA-3' | 5'- CGCACCTCCACATAGCTTACAG-3' |
| <i>Cxcl11</i> | 5'- CCTGGGAACGTCTGACTGTG-3'   | 5'- TCTGCAGCCTGGTAATACGTG-3'  |
| <i>Hprt</i>   | 5'-TTACCTCACTGCTTTCCGGAG -3'  | 5'-AAAAGCGGTCTGAGGAGGAAG-3'   |
| <i>Rpl13</i>  | 5'-CGAGGCATGCTGCCCCACAA-3'    | 5'-AGCAGGGACCACCATCCGCT-3'    |
